# Supplementary material for: Influence of Stress Severity on Contextual Fear Extinction and Avoidance in a Posttraumatic-like Mouse Model
Source: MDPI journal article supplement (doi:10.3390/brainsci14040311), 2024-03-26
Supplement: s1 [file s1]

# Influence of Stress Severity on Contextual Fear Extinction and Avoidance in a Posttraumatic-Like Mouse Model

Noémie Eyraud <sup>1</sup>, Solal Bloch <sup>1</sup>, Bruno Brizard <sup>1</sup>, Laurane Pena <sup>1</sup>, Antoine Tharsis <sup>1</sup>, Alexandre Surget <sup>1</sup>, Wissam El-Hage <sup>1,2</sup> and Catherine Belzung <sup>1,\*</sup>

<sup>1</sup> Institut National de la Santé et de la Recherche Médicale (INSERM), Imaging Brain & Neuropsychiatry iBrain U1253, Université de Tours, 37032 Tours, France

<sup>2</sup> Pôle de Psychiatrie et d'Addictologie, Centre Hospitalier Régional Universitaire de Tours, 37000 Tours, France

\* Correspondence: catherine.belzung@univ-tours.fr

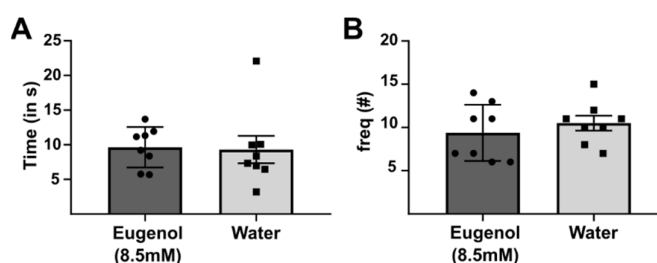

**Figure S1.** Eugenol did not induce preference behaviors in naïve C57BL6N mice. The odor preference test was performed in a three-chamber arena with on one side an object cleaned with an 8.5mM solution of eugenol and on the other side the identical object but cleaned with water. Mice were placed at the center of the arena and were allowed to explore for 10 minutes (A) the time spent sniffing the objects was manually measured. Mice spent the same amount of time sniffing both the eugenol-scented object and the neutral-scented object (paired t-test:  $t=0.1394$ ,  $p=0.8930$ ). (B) They did not exhibit higher frequency (freq) of smelling event on either object (paired t-test:  $t=0.6854$ ,  $p=0.5151$ ).

**Table S1.** Detailed statistical analysis and results for each behavioral outcome presented (ext: Extinction).

| Behavioral Test                                                                   | Statistical Test | p-Value                                            | post-hoc                                                                                      |
|-----------------------------------------------------------------------------------|------------------|----------------------------------------------------|-----------------------------------------------------------------------------------------------|
| Distance moved during habituation to NOR arena                                    | Shapiro-Wilk     | $p=0.1986$                                         |                                                                                               |
|                                                                                   | Bartlett's       | $p=0.3070$                                         |                                                                                               |
|                                                                                   | Brown-Forsythe   | $p=0.1238$                                         |                                                                                               |
|                                                                                   | One-way ANOVA    | $F(2, 55)=10.58$ ; $p=0.0001$                      |                                                                                               |
| Correlation distance moved during habituation and freezing at the 1st re-exposure | Shapiro-Wilk     | PTSD2: Distance: $p=0.5666$ ; freezing: $p=0.7867$ | Tukey<br>CTRL vs PTSD2: $p=0.0004$<br>CTRL vs PTSD4: $p=0.0007$<br>PTSD2 vs PTSD4: $p=0.9786$ |
|                                                                                   |                  | PTSD4: Distance: $p=0.1865$ ; freezing: $p=0.6214$ |                                                                                               |
|                                                                                   | Pearson          | PTSD2: $r=-0.3551$ ; $p=0.1261$                    |                                                                                               |
|                                                                                   |                  | PTSD4: $r=-0.5422$ ; $p=0.0135$                    |                                                                                               |
| Familiarization during NOR learning                                               | Shapiro-Wilk     | $p=0.0159$                                         |                                                                                               |
|                                                                                   | Bartlett's       | $p=0.6741$                                         |                                                                                               |

|                                                         |                          |                                                                                                           |                                                                                                                                                                                                            |
|---------------------------------------------------------|--------------------------|-----------------------------------------------------------------------------------------------------------|------------------------------------------------------------------------------------------------------------------------------------------------------------------------------------------------------------|
|                                                         | Kruskal-Wallis           | H=11.39, p=0.0034                                                                                         | Dunn<br>CTRL vs PTSD2: p=0.0042<br>CTRL vs PTSD4: p=0.0277<br>PTSD2 vs PTSD4: p>0.9999                                                                                                                     |
| Distance moved during NOR test                          | Shapiro-Wilk             | p=0.8745                                                                                                  |                                                                                                                                                                                                            |
|                                                         | Bartlett's               | p=0.1472                                                                                                  |                                                                                                                                                                                                            |
|                                                         | Brown-Forsythe           | p=0.1221                                                                                                  |                                                                                                                                                                                                            |
|                                                         | One-way ANOVA            | F(2, 55)=2.221; p=0.1182                                                                                  | Tukey<br>CTRL vs PTSD2: p=0.9916<br>CTRL vs PTSD4: p=0.0545<br>PTSD2 vs PTSD4: p=0.0345                                                                                                                    |
| NOR test (gross)                                        | 2w RM ANOVA              | Interaction: F(2, 55)=1.231; p=0.2999<br>grp: F(1, 55)=2.706; p=0.1057<br>obj: F(2, 55)=4.819; p=0.0118   | Sidak on obj factor new vs known<br>CTRL: p>0.999<br>PTSD2: p=0.9041<br>PTSD4: p=0.0868                                                                                                                    |
| NOR test (normalized)                                   | Shapiro-Wilk             | p=0.9820                                                                                                  |                                                                                                                                                                                                            |
|                                                         | Bartlett's               | p=0.3019                                                                                                  |                                                                                                                                                                                                            |
|                                                         | Brown-Forsythe           | p=0.5024                                                                                                  |                                                                                                                                                                                                            |
|                                                         | 1w ANOVA                 | F(2, 55)=4.113; p=0.0216                                                                                  |                                                                                                                                                                                                            |
|                                                         | One sample t test vs 50% | CTRL: t=0.05118; df=17; p=0.9598<br>PTSD2: t=0.1173; df=19; p=0.9078<br>PTSD4: t=3.539; df=19; p=0.0022   |                                                                                                                                                                                                            |
| Distance moved during the avoidance test                | Shapiro-Wilk             | p=0.0004                                                                                                  |                                                                                                                                                                                                            |
|                                                         | Bartlett's               | p=0.0149                                                                                                  |                                                                                                                                                                                                            |
|                                                         | Kruskal-Wallis           | H=10.21; p=0.0061                                                                                         | Dunn<br>CTRL vs PTSD2: p=0.0133<br>CTRL vs PTSD4: p=0.0187<br>PTSD2 vs PTSD4: p>0.9999                                                                                                                     |
| Time spent on each object during avoidance test pre-ext | 2w RM ANOVA              | Interaction: F(2, 55)=2.352; p=0.1047<br>grp: F(2, 55)=26.25; p<0.0001<br>obj: F(1, 55) = 23.28; p<0.0001 | Tukey (group factor):<br>CTRL vs PTSD2: p<0.0001<br>CTRL vs PTSD4: p<0.0001<br>PTSD2 vs PTSD4: p=0.8335<br>Sidak (obj factor: neutral - reminder):<br>CTRL: p=0.6481<br>PTSD2: p=0.0003<br>PTSD4: p=0.0077 |
| Time spent in each room during avoidance test pre-ext   | 2w RM ANOVA              | Interaction: F(2, 55)=12.83; p<0.0001<br>grp: F(2, 55)=18.67; p<0.0001<br>room: F(1, 55)=55.29; p<0.0001  | Tukey (interaction):<br>neutral: CTRL vs PTSD2: p=0.9891<br>CTRL vs PTSD4: p=0.9942<br>PTSD2 vs PTSD4: p=0.9660<br>reminder: CTRL vs PTSD2: p<0.0001<br>CTRL vs PTSD4: p<0.0001                            |

|                                                          |                 |                                                                                                                                                                                                                                                                                                                                                                                                                                                                                                                                                                                                                                                                                                                                                                                                                     |                                                                                                                                                                                                                        |
|----------------------------------------------------------|-----------------|---------------------------------------------------------------------------------------------------------------------------------------------------------------------------------------------------------------------------------------------------------------------------------------------------------------------------------------------------------------------------------------------------------------------------------------------------------------------------------------------------------------------------------------------------------------------------------------------------------------------------------------------------------------------------------------------------------------------------------------------------------------------------------------------------------------------|------------------------------------------------------------------------------------------------------------------------------------------------------------------------------------------------------------------------|
|                                                          |                 | PTSD2 vs PTSD4: $p=0.5417$<br>Sidak (neutral vs reminder)<br>CTRL: $p=0.9987$<br>PTSD2: $p<0.0001$<br>PTSD4: $p<0.0001$                                                                                                                                                                                                                                                                                                                                                                                                                                                                                                                                                                                                                                                                                             |                                                                                                                                                                                                                        |
|                                                          |                 | Tukey (Day×group):<br>CTRL: day 1 vs day 2 $p=0.8741$<br>day 2 vs day 3 $p>0.9999$<br>PTSD2: day 1 vs day 2 $p<0.0001$<br>day 2 vs day 3 $p=0.0002$<br>PTSD4: day 1 vs day 2 $p<0.0001$<br>day 2 vs day 3 $p=0.0006$<br>Day 1: CTRL vs PTSD2 $p<0.0001$<br>CTRL vs PTSD4 $p<0.0001$<br>PTSD2 vs PTSD4 $p=0.9320$<br>Day 2: CTRL vs PTSD2 $p<0.0001$<br>CTRL vs PTSD4 $p<0.0001$<br>PTSD2 vs PTSD4 $p=0.9925$<br>Day 3: CTRL vs PTSD2 $p<0.0001$<br>CTRL vs PTSD4 $p<0.0001$<br>PTSD2 vs PTSD4 $p=0.8312$<br>Tukey (time×group):<br>CTRL: 5min vs 10min $p>0.9999$<br>5min vs 15min $p>0.9999$<br>5min vs 20min $p>0.9999$<br>PTSD2 : 5min vs 10min $p=0.8679$<br>5min vs 15min $p<0.0001$<br>10min vs 20min $p<0.0001$<br>PTSD4 : 5min vs 10min $p>0.9999$<br>5min vs 15min $p<0.0001$<br>10min vs 20min $p<0.0001$ |                                                                                                                                                                                                                        |
| Extinction acquisition                                   | RM GLM          | Day×Time×group: $F(12, 330)=1.28$ ; $p=0.2261$<br>Day×group: $F(4, 110)=21.22$ ; $p<0.0001$<br>Time×group: $F(6, 165)=15.82$ ; $p<0.0001$                                                                                                                                                                                                                                                                                                                                                                                                                                                                                                                                                                                                                                                                           |                                                                                                                                                                                                                        |
| Retrieval vs 1 <sup>st</sup> re-exposure                 | 2-way ANOVA     | Interaction: $F(2, 55)=13.24$ ; $p<0.0001$<br>grp: $F(2, 55)=115.3$ ; $p<0.0001$<br>day: $F(1, 55)=137.3$ ; $p<0.0001$                                                                                                                                                                                                                                                                                                                                                                                                                                                                                                                                                                                                                                                                                              | Tukey (retention):<br>CTRL vs PTSD2: $p<0.0001$<br>CTRL vs PTSD4: $p<0.0001$<br>PTSD2 vs PTSD4: $p=0.6361$<br>Sidak (day factor: re-expo 1 - retention):<br>CTRL: $p=0.0435$<br>PTSD2: $p<0.0001$<br>PTSD4: $p<0.0001$ |
| % of extinction: PTSD2 vs PTSD4                          | Shapiro-Wilk    | $p=0.2315$                                                                                                                                                                                                                                                                                                                                                                                                                                                                                                                                                                                                                                                                                                                                                                                                          |                                                                                                                                                                                                                        |
|                                                          | F test          | $p=0.1328$                                                                                                                                                                                                                                                                                                                                                                                                                                                                                                                                                                                                                                                                                                                                                                                                          |                                                                                                                                                                                                                        |
|                                                          | Unpaired t-test | $p=0.3613$                                                                                                                                                                                                                                                                                                                                                                                                                                                                                                                                                                                                                                                                                                                                                                                                          |                                                                                                                                                                                                                        |
| Proportion of low extinction                             | Khi2            | $P=0.52$                                                                                                                                                                                                                                                                                                                                                                                                                                                                                                                                                                                                                                                                                                                                                                                                            |                                                                                                                                                                                                                        |
| Distance moved during the avoidance test post-extinction | Shapiro-Wilk    | $p=0.2863$                                                                                                                                                                                                                                                                                                                                                                                                                                                                                                                                                                                                                                                                                                                                                                                                          |                                                                                                                                                                                                                        |
|                                                          | Bartlett's      | $p=0.8603$                                                                                                                                                                                                                                                                                                                                                                                                                                                                                                                                                                                                                                                                                                                                                                                                          |                                                                                                                                                                                                                        |
|                                                          | Brown-Forsythe  | $p=0.7180$                                                                                                                                                                                                                                                                                                                                                                                                                                                                                                                                                                                                                                                                                                                                                                                                          |                                                                                                                                                                                                                        |
|                                                          | 1w ANOVA        | $F(2, 27)=7.715$ ; $p=0.0022$                                                                                                                                                                                                                                                                                                                                                                                                                                                                                                                                                                                                                                                                                                                                                                                       | Tukey<br>CTRL vs PTSD2: $p=0.0016$<br>CTRL vs PTSD4: $p=0.0652$<br>PTSD2 vs PTSD4: $p=0.2861$                                                                                                                          |

|                                                          |                |                                                                                                                       |                                                                                                                                                                                                                                                                                                                            |
|----------------------------------------------------------|----------------|-----------------------------------------------------------------------------------------------------------------------|----------------------------------------------------------------------------------------------------------------------------------------------------------------------------------------------------------------------------------------------------------------------------------------------------------------------------|
| Time spent on each object during avoidance test post-ext | 2w RM ANOVA    | Interaction: $F(2, 27)=6.899$ ; $p=0.0038$<br>grp: $F(2, 27)=2.995$ ; $p=0.0669$<br>obj: $F(1,27)=4.599$ ; $p=0.0411$ | Tukey (interaction):<br>neutral:<br>CTRL vs PTSD2: $p=0.8097$<br>CTRL vs PTSD4: $p=0.0337$<br>PTSD2 vs PTSD4: $p=0.1334$<br>reminder:<br>CTRL vs PTSD2: $p=0.0033$<br>CTRL vs PTSD4: $p=0.0870$<br>PTSD2 vs PTSD4: $p=0.4040$<br>Sidak (neutral vs reminder)<br>CTRL: $p=0.2417$<br>PTSD2: $p=0.0684$<br>PTSD4: $p=0.0141$ |
| Time spent in each room during avoidance test post-ext   | 2w RM ANOVA    | Interaction: $F(2, 27)=7.020$ ; $p=0.0035$<br>grp: $F(2, 27)=2.641$ ; $p=0.0896$<br>obj: $F(1,27)=27.36$ ; $p<0.0001$ | Tukey (interaction):<br>neutral: CTRL vs PTSD2: $p=0.0765$<br>CTRL vs PTSD4: $p=0.0689$<br>PTSD2 vs PTSD4: $p=0.9988$<br>reminder: CTRL vs PTSD2: $p=0.0005$<br>CTRL vs PTSD4: $p=0.0038$<br>PTSD2 vs PTSD4: $p=0.7997$<br>Sidak (neutral vs reminder)<br>CTRL: $p>0.9999$<br>PTSD2: $p=0.0002$<br>PTSD4: $p=0.0006$       |
| Latency to go to the lighted room (BCO)                  | Shapiro-Wilk   | $p<0.0001$                                                                                                            |                                                                                                                                                                                                                                                                                                                            |
|                                                          | Bartlett's     | $p<0.0001$                                                                                                            |                                                                                                                                                                                                                                                                                                                            |
|                                                          | Kruskal-Wallis | $H=1.456$ ; $p=0.4828$                                                                                                |                                                                                                                                                                                                                                                                                                                            |
| time spent in the lighted room (BCO)                     | Shapiro-Wilk   | $p<0.0001$                                                                                                            |                                                                                                                                                                                                                                                                                                                            |
|                                                          | Bartlett's     | $p=0.0177$                                                                                                            |                                                                                                                                                                                                                                                                                                                            |
|                                                          | Kruskal-Wallis | $H=2.093$ ; $p=0.3512$                                                                                                |                                                                                                                                                                                                                                                                                                                            |
